# Supplementary material
Source: publisher site journal article supplement (https://www.dovepress.com/article/353700)
Supplement: Supplementary file 1 [file get_supplementary_file.php]

## استمارة قياس الضغط النفسي للبالغين (STAI-Y)

الاسم:..... العمر:..... التاريخ:.....

### حصر حالات القلق

يرجى قراءة كل عبارة ووضع علامة دائرة على الرقم الذي يشير الى احساسك في هذه اللحظة

مقياس التقييم:

|              |              |                 |                |
|--------------|--------------|-----------------|----------------|
| 1. لا اطلاقا | 2. بعض الشيء | 4. بدرجة متوسطة | 4. بدرجة كبيرة |
|--------------|--------------|-----------------|----------------|

|     |                                                      |   |   |   |   |
|-----|------------------------------------------------------|---|---|---|---|
| 1.  | أشعر بالهدوء                                         | 1 | 2 | 3 | 4 |
| 2.  | أشعر بالأمان                                         | 1 | 2 | 3 | 4 |
| 3.  | أنا متوتر                                            | 1 | 2 | 3 | 4 |
| 4.  | أشعر بالارهاق والتكلف                                | 1 | 2 | 3 | 4 |
| 5.  | أشعر بالارتياح                                       | 1 | 2 | 3 | 4 |
| 6.  | أشعر بالإنزعاج                                       | 1 | 2 | 3 | 4 |
| 7.  | أنا قلق في الوقت الحاضر حول الاحداث المحتملة مستقبلا | 1 | 2 | 3 | 4 |
| 8.  | أشعر بالرضا                                          | 1 | 2 | 3 | 4 |
| 9.  | أشعر بالخوف                                          | 1 | 2 | 3 | 4 |
| 10. | أشعر بأنني مرتاح                                     | 1 | 2 | 3 | 4 |
| 11. | أشعر بالثقة بالنفس                                   | 1 | 2 | 3 | 4 |
| 12. | أشعر بأنني عصبي                                      | 1 | 2 | 3 | 4 |
| 13. | أنا مضطرب                                            | 1 | 2 | 3 | 4 |
| 14. | أشعر بأنني لا أستطيع اتخاذ قرار                      | 1 | 2 | 3 | 4 |
| 15. | أشعر بالإسترخاء                                      | 1 | 2 | 3 | 4 |
| 16. | أشعر برضا وطمأنينة                                   | 1 | 2 | 3 | 4 |
| 17. | أنا قلق                                              | 1 | 2 | 3 | 4 |
| 18. | أشعر بالارتباك                                       | 1 | 2 | 3 | 4 |
| 19. | أشعر بالثبات                                         | 1 | 2 | 3 | 4 |
| 20. | أشعر أنني بحالة جيدة                                 | 1 | 2 | 3 | 4 |

## استمارة قياس الضغط النفسي للبالغين (STAI-Y)

### حصر سمات القلق

يرجى قراءة كل عبارة ووضع علامة دائرة على الرقم الذي يشير الى احساسك في هذه اللحظة

مقياس التقييم:

|              |              |                 |                |
|--------------|--------------|-----------------|----------------|
| 1. لا اطلاقا | 2. بعض الشيء | 4. بدرجة متوسطة | 4. بدرجة كبيرة |
|--------------|--------------|-----------------|----------------|

|     |                                                                        |   |   |   |   |
|-----|------------------------------------------------------------------------|---|---|---|---|
| 1.  | أشعر أنني بخير                                                         | 1 | 2 | 3 | 4 |
| 2.  | أشعر أنني عصبي ومتضابق                                                 | 1 | 2 | 3 | 4 |
| 3.  | شعر بالارتياح مع نفسي                                                  | 1 | 2 | 3 | 4 |
| 4.  | أتمنى أن أكون سعيدا مثل الآخرين                                        | 1 | 2 | 3 | 4 |
| 5.  | أشعر بالاخفاق                                                          | 1 | 2 | 3 | 4 |
| 6.  | أشعر بالراحة                                                           | 1 | 2 | 3 | 4 |
| 7.  | أنا هادئ ووقور ومسيطر على نفسي                                         | 1 | 2 | 3 | 4 |
| 8.  | أشعر أن الصعوبات تتراكم علي ولا أستطيع التغلب عليها                    | 1 | 2 | 3 | 4 |
| 9.  | أنا قلق بشدة على بعض الأشياء التي حقيقة غير مهمة                       | 1 | 2 | 3 | 4 |
| 10. | أنا سعيد                                                               | 1 | 2 | 3 | 4 |
| 11. | لدي أفكار مزعجة                                                        | 1 | 2 | 3 | 4 |
| 12. | ينقصني الثقة بالنفس                                                    | 1 | 2 | 3 | 4 |
| 13. | أشعر بالأمان                                                           | 1 | 2 | 3 | 4 |
| 14. | أأخذ القرارات بسهولة                                                   | 1 | 2 | 3 | 4 |
| 15. | أشعر أنني غير فعال                                                     | 1 | 2 | 3 | 4 |
| 16. | أنا راض ومطمئن                                                         | 1 | 2 | 3 | 4 |
| 17. | بعض الأفكار غير المهمة تدور في رأسي وتضايقتني                          | 1 | 2 | 3 | 4 |
| 18. | أنا أتلقى خيبات الأمل بجدية حيث لأستطيع إبعادها عن ذهني                | 1 | 2 | 3 | 4 |
| 19. | أنا شخص مستقر                                                          | 1 | 2 | 3 | 4 |
| 20. | أصاب بحالة من التوتر والاضطراب عندما أفكر في اهتماماتي ومصالحي الحالية | 1 | 2 | 3 | 4 |

For use by Ali Alghamdi only. Received from Mind Garden, Inc. on February 2, 2022

**Permission for Ali Alghamdi to reproduce 100 copies  
within three years of February 2, 2022**

**State-Trait Anxiety Inventory  
for Adults™  
Instrument and Scoring Key**

**Developed by Charles D. Spielberger**

in collaboration with R.L. Gorsuch, R. Lushene, P.R. Vagg, and G.A. Jacobs

Published by Mind Garden, Inc.

info@mindgarden.com

www.mindgarden.com

**IMPORTANT NOTE TO LICENSEE**

If you have purchased a license to reproduce or administer a fixed number of copies of an existing Mind Garden instrument, manual, or workbook, you agree that it is your legal responsibility to compensate the copyright holder of this work -- via payment to Mind Garden – for reproduction or administration in any medium. **Reproduction includes all forms of physical or electronic administration including online survey, handheld survey devices, etc.**

The copyright holder has agreed to grant a license to reproduce the specified number of copies of this document or instrument **within three years from the date of purchase.**

**You agree that you or a person in your organization will be assigned to track the number of reproductions or administrations and will be responsible for compensating Mind Garden for any reproductions or administrations in excess of the number purchased.**

*This instrument is covered by U.S. and international copyright laws as well as various state and federal laws regarding data protection. Any use of this instrument, in whole or in part, is subject to such laws and is expressly prohibited by the copyright holder. If you would like to request permission to use or reproduce the instrument, in whole or in part, contact Mind Garden, Inc.*

**SELF-EVALUATION QUESTIONNAIRE STAI Form Y-1**

**Please provide the following information:**

Name \_\_\_\_\_ Date \_\_\_\_\_ S \_\_\_\_\_  
Age \_\_\_\_\_ Gender (*Circle*) M F T \_\_\_\_\_

**DIRECTIONS:**

A number of statements which people have used to describe themselves are given below. Read each statement and then circle the appropriate number to the right of the statement to indicate how you feel *right* now, that is, *at this moment*. There are no right or wrong answers. Do not spend too much time on any one statement but give the answer which seems to describe your present feelings best.

VERY MUCH SO  
MODERATELY SO  
SOMEWHAT  
NOT AT ALL

- 1. I feel calm ..... 1 2 3 4
- 2. I feel secure ..... 1 2 3 4
- 3. I am tense ..... 1 2 3 4
- 4. I feel strained..... 1 2 3 4
- 5. I feel at ease ..... 1 2 3 4
- 6. I feel upset..... 1 2 3 4
- 7. I am presently worrying over possible misfortunes ..... 1 2 3 4
- 8. I feel satisfied..... 1 2 3 4
- 9. I feel frightened..... 1 2 3 4
- 10. I feel comfortable ..... 1 2 3 4
- 11. I feel self-confident..... 1 2 3 4
- 12. I feel nervous..... 1 2 3 4
- 13. I am jittery..... 1 2 3 4
- 14. I feel indecisive ..... 1 2 3 4
- 15. I am relaxed..... 1 2 3 4
- 16. I feel content ..... 1 2 3 4
- 17. I am worried..... 1 2 3 4
- 18. I feel confused..... 1 2 3 4
- 19. I feel steady ..... 1 2 3 4
- 20. I feel pleasant ..... 1 2 3 4

## SELF-EVALUATION QUESTIONNAIRE

### STAI Form Y-2

Name \_\_\_\_\_ Date \_\_\_\_\_

#### DIRECTIONS

A number of statements which people have used to describe themselves are given below. Read each statement and then circle the appropriate number to the right of the statement to indicate how you *generally* feel.

ALMOST NEVER  
SOMETIMES  
OFTEN  
ALMOST ALWAYS

- |                                                                                                   |   |   |   |   |
|---------------------------------------------------------------------------------------------------|---|---|---|---|
| 21. I feel pleasant .....                                                                         | 1 | 2 | 3 | 4 |
| 22. I feel nervous and restless .....                                                             | 1 | 2 | 3 | 4 |
| 23. I feel satisfied with myself.....                                                             | 1 | 2 | 3 | 4 |
| 24. I wish I could be as happy as others seem to be.....                                          | 1 | 2 | 3 | 4 |
| 25. I feel like a failure .....                                                                   | 1 | 2 | 3 | 4 |
| 26. I feel rested.....                                                                            | 1 | 2 | 3 | 4 |
| 27. I am “calm, cool, and collected” .....                                                        | 1 | 2 | 3 | 4 |
| 28. I feel that difficulties are piling up so that I cannot overcome them.....                    | 1 | 2 | 3 | 4 |
| 29. I worry too much over something that really doesn’t matter .....                              | 1 | 2 | 3 | 4 |
| 30. I am happy.....                                                                               | 1 | 2 | 3 | 4 |
| 31. I have disturbing thoughts.....                                                               | 1 | 2 | 3 | 4 |
| 32. I lack self-confidence .....                                                                  | 1 | 2 | 3 | 4 |
| 33. I feel secure .....                                                                           | 1 | 2 | 3 | 4 |
| 34. I make decisions easily .....                                                                 | 1 | 2 | 3 | 4 |
| 35. I feel inadequate .....                                                                       | 1 | 2 | 3 | 4 |
| 36. I am content.....                                                                             | 1 | 2 | 3 | 4 |
| 37. Some unimportant thought runs through my mind and bothers me.....                             | 1 | 2 | 3 | 4 |
| 38. I take disappointments so keenly that I can’t put them out of my mind .....                   | 1 | 2 | 3 | 4 |
| 39. I am a steady person.....                                                                     | 1 | 2 | 3 | 4 |
| 40. I get in a state of tension or turmoil as I think over my recent concerns and interests ..... | 1 | 2 | 3 | 4 |

**State-Trait Anxiety Inventory  
for Adults™  
Scoring Key**

**Developed by Charles D. Spielberger**  
in collaboration with R.L. Gorsuch, R. Lushene, P.R. Vagg, and G.A. Jacobs

Published by Mind Garden, Inc.

info@mindgarden.com  
www.mindgarden.com

## State-Trait Anxiety Inventory for Adults Scoring Key (Form Y-1, Y-2)

Developed by Charles D. Spielberger in collaboration with R.L. Gorsuch, R. Lushene, P.R. Vagg, and G.A. Jacobs

To use this stencil, fold this sheet in half and line up with the appropriate test side, either Form Y-1 or Form Y-2. Simply total the scoring **weights** shown on the stencil for each response category. For example, for question # 1, if the respondent marked 3, then the **weight** would be **2**. Refer to the manual for appropriate normative data.

| Form Y-1 | NOT AT ALL | SOMEWHAT | MODERATELY SO | VERY MUCH SO | Form Y-2 | ALMOST NEVER | SOMETIMES | OFTEN | ALMOST ALWAYS |
|----------|------------|----------|---------------|--------------|----------|--------------|-----------|-------|---------------|
| 1.       | 4          | 3        | 2             | 1            | 21.      | 4            | 3         | 2     | 1             |
| 2.       | 4          | 3        | 2             | 1            | 22.      | 1            | 2         | 3     | 4             |
| 3.       | 1          | 2        | 3             | 4            | 23.      | 4            | 3         | 2     | 1             |
| 4.       | 1          | 2        | 3             | 4            | 24.      | 1            | 2         | 3     | 4             |
| 5.       | 4          | 3        | 2             | 1            | 25.      | 1            | 2         | 3     | 4             |
| 6.       | 1          | 2        | 3             | 4            | 26.      | 4            | 3         | 2     | 1             |
| 7.       | 1          | 2        | 3             | 4            | 27.      | 4            | 3         | 2     | 1             |
| 8.       | 4          | 3        | 2             | 1            | 28.      | 1            | 2         | 3     | 4             |
| 9.       | 1          | 2        | 3             | 4            | 29.      | 1            | 2         | 3     | 4             |
| 10.      | 4          | 3        | 2             | 1            | 30.      | 4            | 3         | 2     | 1             |
| 11.      | 4          | 3        | 2             | 1            | 31.      | 1            | 2         | 3     | 4             |
| 12.      | 1          | 2        | 3             | 4            | 32.      | 1            | 2         | 3     | 4             |
| 13.      | 1          | 2        | 3             | 4            | 33.      | 4            | 3         | 2     | 1             |
| 14.      | 1          | 2        | 3             | 4            | 34.      | 4            | 3         | 2     | 1             |
| 15.      | 4          | 3        | 2             | 1            | 35.      | 1            | 2         | 3     | 4             |
| 16.      | 4          | 3        | 2             | 1            | 36.      | 4            | 3         | 2     | 1             |
| 17.      | 1          | 2        | 3             | 4            | 37.      | 1            | 2         | 3     | 4             |
| 18.      | 1          | 2        | 3             | 4            | 38.      | 1            | 2         | 3     | 4             |
| 19.      | 4          | 3        | 2             | 1            | 39.      | 4            | 3         | 2     | 1             |
| 20.      | 4          | 3        | 2             | 1            | 40.      | 1            | 2         | 3     | 4             |

**State-Trait Anxiety Inventory  
for Adults™  
(Short Form)**

**Instrument and Scoring Key**

**Developed by Charles D. Spielberger**

in collaboration with R.L. Gorsuch, R. Lushene, P.R. Vagg, and G.A. Jacobs

Published by Mind Garden, Inc.

info@mindgarden.com

www.mindgarden.com

**Important Note to Licensee**

If you have purchased a license to reproduce or administer a fixed number of copies of an existing Mind Garden instrument, manual, or workbook, you agree that it is your legal responsibility to compensate the copyright holder of this work -- via payment to Mind Garden -- for reproduction or administration in any medium. **Reproduction includes all forms of physical or electronic administration including online survey, handheld survey devices, etc.**

The copyright holder has agreed to grant a license to reproduce the specified number of copies of this document or instrument **within one year from the date of purchase.**

**You agree that you or a person in your organization will be assigned to track the number of reproductions or administrations and will be responsible for compensating Mind Garden for any reproductions or administrations in excess of the number purchased.**

This instrument is covered by U.S. and international copyright laws as well as various state and federal laws regarding data protection. Any use of this instrument, in whole or in part, is subject to such laws and is expressly prohibited by the copyright holder. If you would like to request permission to use or reproduce this instrument, in whole or in part, contact Mind Garden, Inc. [www.mindgarden.com](http://www.mindgarden.com).

Mind Garden is a registered ® trademark of Mind Garden, Inc. State-Trait Anxiety Inventory for Adults is a trademark of Charles D. Spielberger.



**Self-Evaluation Questionnaire**  
**STAIAD Short Form Y-1**

Please provide the following information:

Name \_\_\_\_\_ Date \_\_\_\_\_ S \_\_\_\_\_  
Age \_\_\_\_\_ Gender (Circle) **M** **F** T \_\_\_\_\_

**Directions:** A number of statements which people have used to describe themselves are given below. Read each statement and then circle the appropriate number to the right of the statement to indicate how you feel **right** now, that is, **at this moment**. There are no right or wrong answers. Do not spend too much time on any one statement but give the answer which seems to describe your present feelings best. Use the following scale:

NOT AT ALL – SOMEWHAT – MODERATELY SO – VERY MUCH SO

NOT AT ALL  
SOMEWHAT  
MODERATELY SO  
VERY MUCH SO

- |                                                           |   |   |   |   |
|-----------------------------------------------------------|---|---|---|---|
| 1. I feel calm .....                                      | 1 | 2 | 3 | 4 |
| 2. I am tense.....                                        | 1 | 2 | 3 | 4 |
| 3. I feel at ease.....                                    | 1 | 2 | 3 | 4 |
| 4. I am presently worrying over possible misfortunes..... | 1 | 2 | 3 | 4 |
| 5. I feel frightened.....                                 | 1 | 2 | 3 | 4 |
| 6. I feel nervous.....                                    | 1 | 2 | 3 | 4 |
| 7. I am jittery.....                                      | 1 | 2 | 3 | 4 |
| 8. I am relaxed.....                                      | 1 | 2 | 3 | 4 |
| 9. I am worried.....                                      | 1 | 2 | 3 | 4 |
| 10. I feel steady.....                                    | 1 | 2 | 3 | 4 |

## SELF-EVALUATION QUESTIONNAIRE

### STAIAD Short Form Y-2

Name \_\_\_\_\_ Date \_\_\_\_\_

**Directions:** A number of statements which people have used to describe themselves are given below. Read each statement and then circle the appropriate number to the right of the statement to indicate how you **generally** feel.

Use the following scale:

ALMOST NEVER – SOMETIMES – OFTEN – ALMOST ALWAYS

|                                                                                                  | ALMOST NEVER | SOMETIMES | OFTEN | ALMOST ALWAYS |
|--------------------------------------------------------------------------------------------------|--------------|-----------|-------|---------------|
| 11. I feel nervous and restless .....                                                            | 1            | 2         | 3     | 4             |
| 12. I feel satisfied with myself .....                                                           | 1            | 2         | 3     | 4             |
| 13. I wish I could be as happy as others seem to be.....                                         | 1            | 2         | 3     | 4             |
| 14. I feel like a failure.....                                                                   | 1            | 2         | 3     | 4             |
| 15. I worry too much over something that really doesn't matter .....                             | 1            | 2         | 3     | 4             |
| 16. I lack self-confidence .....                                                                 | 1            | 2         | 3     | 4             |
| 17. I feel secure .....                                                                          | 1            | 2         | 3     | 4             |
| 18. I feel inadequate .....                                                                      | 1            | 2         | 3     | 4             |
| 19. I am a steady person .....                                                                   | 1            | 2         | 3     | 4             |
| 20. I get in a state of tension or turmoil as I think over my recent concerns and interests..... | 1            | 2         | 3     | 4             |

**State-Trait Anxiety Inventory  
for Adults™  
(Short Form)  
Scoring Key**

**Developed by Charles D. Spielberger**  
in collaboration with R.L. Gorsuch, R. Lushene, P.R. Vagg, and G.A. Jacobs

Published by Mind Garden, Inc.

info@mindgarden.com  
www.mindgarden.com

## State-Trait Anxiety Inventory for Adults Short Form Scoring Key (Short Form Y-1, Short Form Y-2)

**Developed by Charles D. Spielberger** in collaboration with R.L. Gorsuch, R. Lushene, P.R. Vagg, and G.A. Jacobs

To use this stencil, line up with the appropriate test side, either Short Form Y-1 or Short Form Y-2. Simply total the scoring **weights** shown on the stencil for each response category. For example, for question # 1, if the respondent marked 3, then the **weight** would be **2**. Refer to the State Trait Anxiety Inventory for Adults manual for appropriate normative data.

|                                                            |          | <i>NOT AT ALL</i> | <i>SOMEWHAT</i> | <i>MODERATELY SO</i> | <i>VERY MUCH SO</i> |
|------------------------------------------------------------|----------|-------------------|-----------------|----------------------|---------------------|
| <b>Short Form Y-1</b>                                      |          |                   |                 |                      |                     |
| <b>1. I feel calm .....</b>                                | <b>4</b> | <b>3</b>          | <b>2</b>        | <b>1</b>             |                     |
| 2. I am tense .....                                        | 1        | 2                 | 3               | 4                    |                     |
| <b>3. I feel at ease .....</b>                             | <b>4</b> | <b>3</b>          | <b>2</b>        | <b>1</b>             |                     |
| 4. I am presently worrying over possible misfortunes ..... | 1        | 2                 | 3               | 4                    |                     |
| 5. I feel frightened .....                                 | 1        | 2                 | 3               | 4                    |                     |
| 6. I feel nervous .....                                    | 1        | 2                 | 3               | 4                    |                     |
| 7. I am jittery .....                                      | 1        | 2                 | 3               | 4                    |                     |
| <b>8. I am relaxed .....</b>                               | <b>4</b> | <b>3</b>          | <b>2</b>        | <b>1</b>             |                     |
| 9. I am worried .....                                      | 1        | 2                 | 3               | 4                    |                     |
| <b>10. I feel steady .....</b>                             | <b>4</b> | <b>3</b>          | <b>2</b>        | <b>1</b>             |                     |

|                                                                                                   | ALMOST NEVER | SOMETIMES | OFTEN    | ALMOST ALWAYS |
|---------------------------------------------------------------------------------------------------|--------------|-----------|----------|---------------|
| <b>Short Form Y-2</b>                                                                             |              |           |          |               |
| 11. I feel nervous and restless .....                                                             | 1            | 2         | 3        | 4             |
| <b>12. I feel satisfied with myself .....</b>                                                     | <b>4</b>     | <b>3</b>  | <b>2</b> | <b>1</b>      |
| 13. I wish I could be as happy as others seem to be .....                                         | 1            | 2         | 3        | 4             |
| 14. I feel like a failure .....                                                                   | 1            | 2         | 3        | 4             |
| 15. I worry too much over something that really doesn't matter .....                              | 1            | 2         | 3        | 4             |
| 16. I lack self-confidence .....                                                                  | 1            | 2         | 3        | 4             |
| <b>17. I feel secure .....</b>                                                                    | <b>4</b>     | <b>3</b>  | <b>2</b> | <b>1</b>      |
| 18. I feel inadequate .....                                                                       | 1            | 2         | 3        | 4             |
| <b>19. I am a steady person .....</b>                                                             | <b>4</b>     | <b>3</b>  | <b>2</b> | <b>1</b>      |
| 20. I get in a state of tension or turmoil as I think over my recent concerns and interests ..... | 1            | 2         | 3        | 4             |

**For Publications:**

We understand situations exist where you may want sample test questions for various fair use situations such as academic, scientific or commentary purposes. No items from this instrument may be included in any publication without the prior express written permission from Mind Garden, Inc. Please understand that disclosing more than we have authorized will compromise the integrity and value of the test.

**For Dissertation and Thesis Appendices:**

You may not include an entire instrument in your thesis or dissertation, however you may use the four sample items specified by Mind Garden. Academic committees understand the requirements of copyright and are satisfied with sample items for appendices and tables. For customers needing permission to reproduce the four sample items in a thesis or dissertation, the following page includes the permission letter and reference information needed to satisfy the requirements of an academic committee.

**Online Use of Mind Garden Instruments:**

Online administration and scoring of the State-Trait Anxiety Inventory for Adults is available from Mind Garden, (<https://www.mindgarden.com/145-state-trait-anxiety-inventory-for-adults>). Mind Garden provides services to add items and demographics to the State-Trait Anxiety Inventory for Adults. Reports are available for the State-Trait Anxiety Inventory for Adults.

If your research uses an online survey platform other than the Mind Garden Transform survey system, you will need to meet Mind Garden's requirements by following the procedure described at [mindgarden.com/mind-garden-forms/58-remote-online-use-application.html](http://mindgarden.com/mind-garden-forms/58-remote-online-use-application.html).

**All Other Special Reproductions:**

For any other special purposes requiring permissions for reproduction of this instrument, please contact [info@mindgarden.com](mailto:info@mindgarden.com).

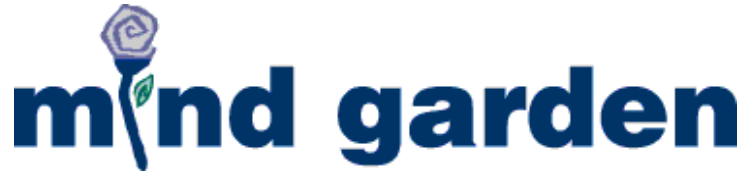

[www.mindgarden.com](http://www.mindgarden.com)

To Whom It May Concern,

The above-named person has made a license purchase from Mind Garden, Inc. and has permission to administer the following copyrighted instrument up to that quantity purchased:

**State-Trait Anxiety Inventory for Adults**

The four sample items only from this instrument as specified below may be included in your thesis or dissertation. Any other use must receive prior written permission from Mind Garden. The entire instrument may not be included or reproduced at any time in any other published material. Please understand that disclosing more than we have authorized will compromise the integrity and value of the test.

**Citation of the instrument must include the applicable copyright statement listed below.**

**Sample Items:**

- I feel at ease
- I feel upset
- I lack self-confidence
- I am a steady person

Copyright © 1968, 1977 by Charles D. Spielberger. All rights reserved in all media.  
Published by Mind Garden, Inc. [www.mindgarden.com](http://www.mindgarden.com)

Sincerely,

Robert Most  
Mind Garden, Inc.  
[www.mindgarden.com](http://www.mindgarden.com)
